# Supplementary material for: Xanthosaponins A and B, two unusual steroidal saponins with an unprecedented 16,17-seco-cholestane skeleton from Solanum xanthocarpum and their cytotoxic activities
Source: Royal Society of Chemistry journal article supplement (doi:10.1039/d1nj05286a), 2021-12-14
Supplement: d1nj05286a1.pdf [file d1nj05286a1.pdf]

Electronic Supplementary Information (ESI) for New Journal of Chemistry.  
This journal is © The Royal Society of Chemistry 2021

## Supplementary Information

**Xanthosaponins A and B, two unusual steroidal saponins with an unprecedented 16,17-*seco*-cholestane skeleton from *Solanum xanthocarpum* and their cytotoxic activities**

Zhen-Peng Xu‡, Yan Liu‡, Xiao-Mao Li, Si-Yi Wang, Peng Jiang, Juan Pan, Yi-Kai Jiang, Hai-Xue Kuang\* and Bing-You Yang\*

### Corresponding Authors

Professor Bing-You Yang and professor Hai-Xue Kuang

College of Pharmacy, Heilongjiang University of Chinese Medicine

24 Heping Road, Xiangfang District, Harbin 150040, P.R. China

\*E-mail: ybywater@163.com (B.-Y. Yang)

\*E-mail: hxkuang@yahoo.com (H.-X. Kuang)

## Contents

**Figure S1.** HR-ESI-MS spectrum of **1**.

**Figure S2.**  $^1\text{H}$  NMR spectrum of **1** (600 MHz, pyridine- $d_5$ ).

**Figure S3.**  $^{13}\text{C}$  NMR spectrum of **1** (150 MHz, pyridine- $d_5$ ).

**Figure S4.** DEPT 135 spectrum of **1**.

**Figure S5.** HSQC spectrum of **1**.

**Figure S6.**  $^1\text{H}$ - $^1\text{H}$  COSY spectrum of **1**.

**Figure S7.** HMBC spectrum of **1**.

**Figure S8.** NOESY spectrum of **1**.

**Figure S9.** IR spectrum of **1**.

**Figure S10.** HR-ESI-MS spectrum of **2**.

**Figure S11.**  $^1\text{H}$  NMR spectrum of **2** (600 MHz, pyridine- $d_5$ ).

**Figure S12.**  $^{13}\text{C}$  NMR spectrum of **2** (150 MHz, pyridine- $d_5$ ).

**Figure S13.** DEPT 135 spectrum of **2**.

**Figure S14.** HSQC spectrum of **2**.

**Figure S15.**  $^1\text{H}$ - $^1\text{H}$  COSY spectrum of **2**.

**Figure S16.** HMBC spectrum of **2**.

**Figure S17.** NOESY spectrum of **2**.

**Figure S18.** IR spectrum of **2**.

**Figure S19.**  $^{13}\text{C}$  NMR spectrum of **1** (100 MHz, methanol- $d_4$ ).

**Figure S20.** Linear correlations between the calculated of 8 isomers and experimental  $^{13}\text{C}$  NMR chemical shifts for compound **1**.

**Figure S21.** HPLC-ELSD analysis of **1**

**Figure S22.** HPLC-ELSD analysis of **2**

**Figure S23.** The partial enlargement of the HSQC spectrum of **1** (a).

**Figure S24.** The partial enlargement of the HSQC spectrum of **1** (b).

**Figure S25.** The partial enlargement of the HSQC spectrum of **1** (c).

**Figure S26.** The partial enlargement of the  $^1\text{H}$ - $^1\text{H}$  COSY spectrum of **1** (a).

**Figure S27.** The partial enlargement of the  $^1\text{H}$ - $^1\text{H}$  COSY spectrum of **1** (b).

**Figure S28.** The partial enlargement of the  $^1\text{H}$ - $^1\text{H}$  COSY spectrum of **1** (c).

**Figure S29.** The partial enlargement of the  $^1\text{H}$ - $^1\text{H}$  COSY spectrum of **1** (e).

**Figure S30.** The partial enlargement of the HMBC spectrum of **1** (a).

**Figure S31.** The partial enlargement of the HMBC spectrum of **1** (b).

**Figure S32.** The partial enlargement of the HMBC spectrum of **1** (c).

**Figure S33.** The partial enlargement of the HMBC spectrum of **1** (d).

**Figure S34.** The partial enlargement of the NOESY spectrum of **1** (a).

**Figure S35.** The partial enlargement of the NOESY spectrum of **1** (b).

**Figure S36.** The partial enlargement of the NOESY spectrum of **1** (c).

**Figure S37.** The partial enlargement of the HSQC spectrum of **2** (a).

**Figure S38.** The partial enlargement of the HSQC spectrum of **2** (b).

**Figure S39.** The partial enlargement of the  $^1\text{H}$ - $^1\text{H}$  COSY spectrum of **2** (a).

**Figure S40.** The partial enlargement of the  $^1\text{H}$ - $^1\text{H}$  COSY spectrum of **2** (b).

**Figure S41.** The partial enlargement of the HMBC spectrum of **2** (a).

**Figure S42.** The partial enlargement of the HMBC spectrum of **2** (b).

**Figure S43.** The partial enlargement of the HMBC spectrum of **2** (c).

**Figure S44.** The partial enlargement of the NOESY spectrum of **2** (a).

**Figure S45.** The partial enlargement of the NOESY spectrum of **2** (b).

**Figure S46.** The partial enlargement of the NOESY spectrum of **2** (c).

**Figure S47.** The partial enlargement of the NOESY spectrum of **2** (d).

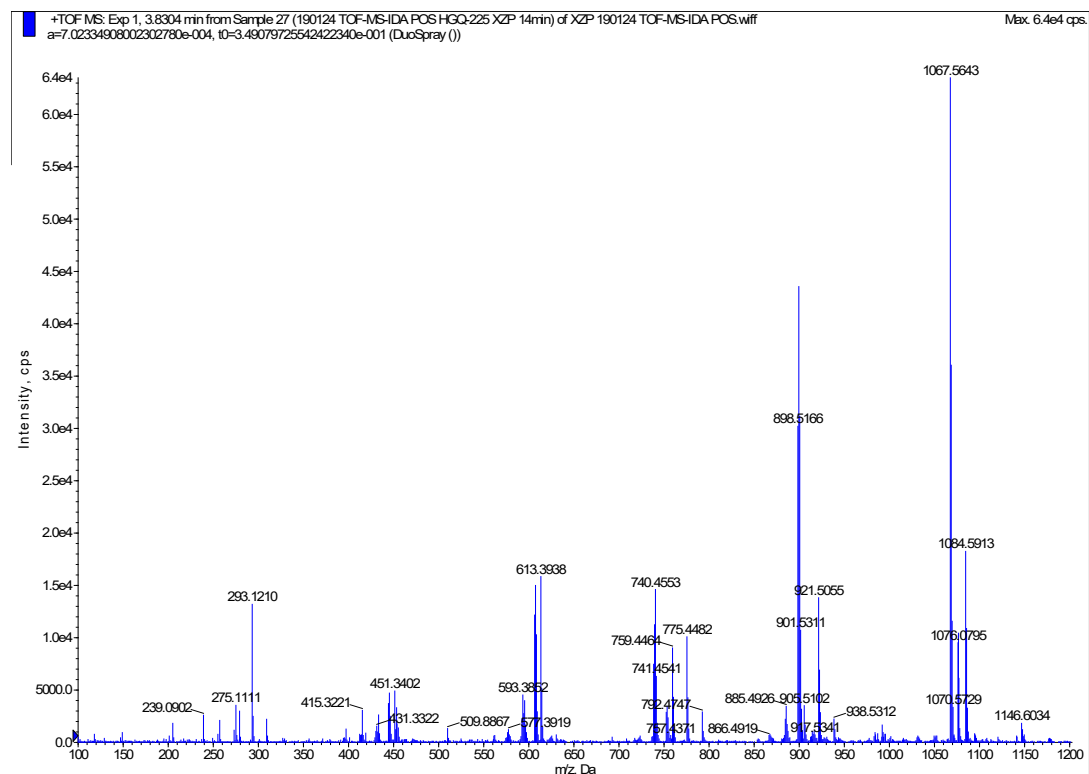

**Figure S1.** HR-ESI-MS spectrum of **1**.

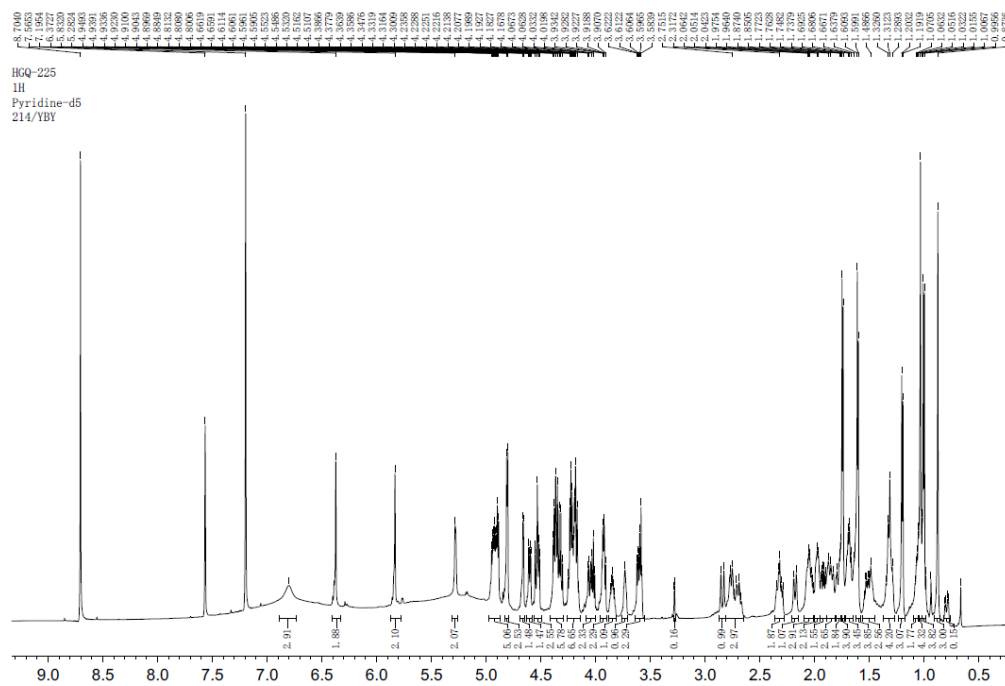

**Figure S2.** <sup>1</sup>H NMR spectrum of **1** (600 MHz, pyridine-*d*<sub>5</sub>).

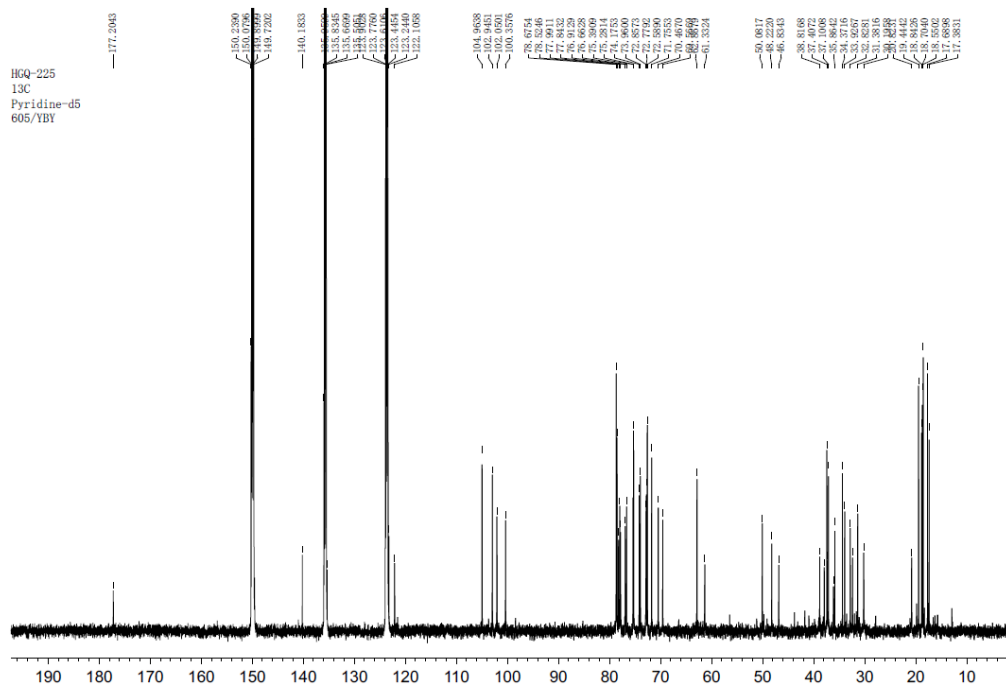

Figure S3.  $^{13}\text{C}$  NMR spectrum of **1** (150 MHz, pyridine- $d_5$ ).

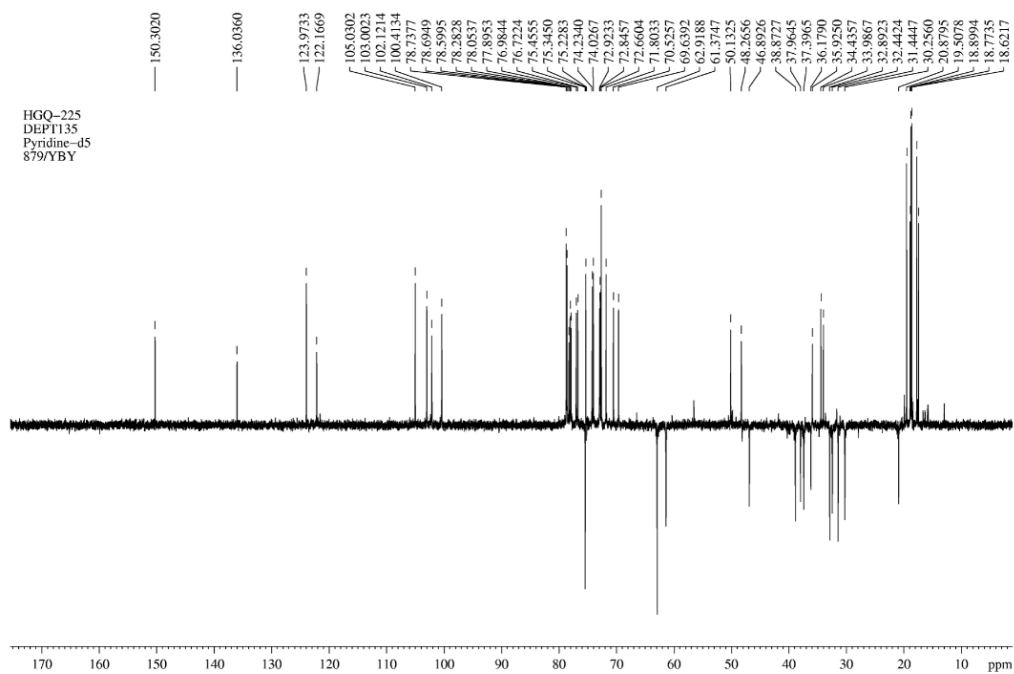

Figure S4. DEPT 135 spectrum of **1**.

HGQ-225  
 HSQC  
 Pyridine-d5  
 882/YBY

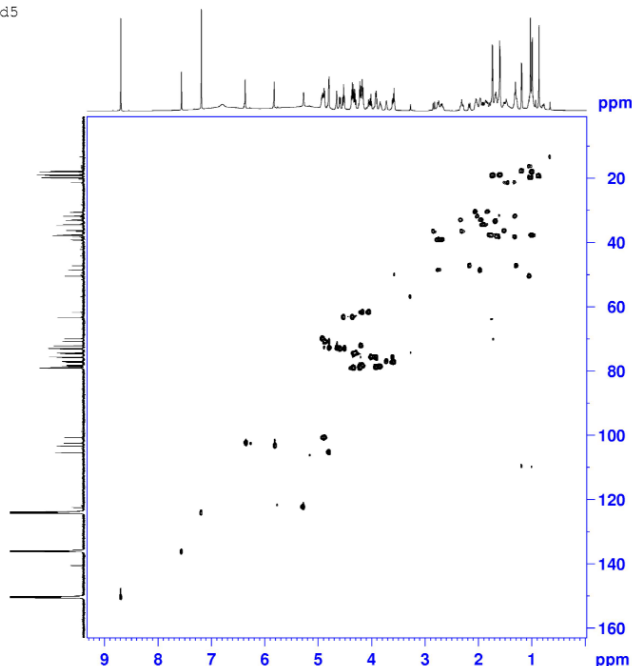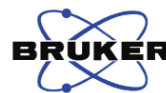

```

Current Data Parameters
NAME          YBY
EXPNO        882
PROCNO       1

F2 - Acquisition Parameters
Date_         20191113
Time         18.03
INSTRUM      Avance
PROBHD       5114601_0311_4
PULPROG      zgpg30p
TD           65536
SOLVENT      Pyz
NS           4
DS           16
SFO1         400.1464000 MHz
FIDRES       3.212577 Hz
AQ           0.1534840 sec
RG           64
SW           16.201
DE           6.200 usec
TE           298.15
CMT2         140.0000000
AQ           2.0000000 sec
d1           1.6600000 sec
d11          0.0017414 sec
d12          0.0000000 sec
d13          0.0000000 sec
DELTA        0.0025264 sec
IN0          0 sec
SFO1CT       0
dSFO1CT      0.00000300 sec
PIL1loop     0
PIL2loop     0
NUC1         13C
NUC2         1H
P1           9.83 usec
P2           19.66 usec
P3           1000.00 usec
PL1          27.0000000 W
PL2          100.0000000 W
PL3          100.0000000 W
PL4          100.0000000 W
PL5          100.0000000 W
PL6          100.0000000 W
PL7          100.0000000 W
PL8          100.0000000 W
PL9          100.0000000 W
PL10         100.0000000 W
PL11         100.0000000 W
PL12         100.0000000 W
PL13         100.0000000 W
PL14         100.0000000 W
PL15         100.0000000 W
PL16         100.0000000 W
PL17         100.0000000 W
PL18         100.0000000 W
PL19         100.0000000 W
PL20         100.0000000 W
PL21         100.0000000 W
PL22         100.0000000 W
PL23         100.0000000 W
PL24         100.0000000 W
PL25         100.0000000 W
PL26         100.0000000 W
PL27         100.0000000 W
PL28         100.0000000 W
PL29         100.0000000 W
PL30         100.0000000 W
PL31         100.0000000 W
PL32         100.0000000 W
PL33         100.0000000 W
PL34         100.0000000 W
PL35         100.0000000 W
PL36         100.0000000 W
PL37         100.0000000 W
PL38         100.0000000 W
PL39         100.0000000 W
PL40         100.0000000 W
PL41         100.0000000 W
PL42         100.0000000 W
PL43         100.0000000 W
PL44         100.0000000 W
PL45         100.0000000 W
PL46         100.0000000 W
PL47         100.0000000 W
PL48         100.0000000 W
PL49         100.0000000 W
PL50         100.0000000 W
PL51         100.0000000 W
PL52         100.0000000 W
PL53         100.0000000 W
PL54         100.0000000 W
PL55         100.0000000 W
PL56         100.0000000 W
PL57         100.0000000 W
PL58         100.0000000 W
PL59         100.0000000 W
PL60         100.0000000 W
PL61         100.0000000 W
PL62         100.0000000 W
PL63         100.0000000 W
PL64         100.0000000 W
PL65         100.0000000 W
PL66         100.0000000 W
PL67         100.0000000 W
PL68         100.0000000 W
PL69         100.0000000 W
PL70         100.0000000 W
PL71         100.0000000 W
PL72         100.0000000 W
PL73         100.0000000 W
PL74         100.0000000 W
PL75         100.0000000 W
PL76         100.0000000 W
PL77         100.0000000 W
PL78         100.0000000 W
PL79         100.0000000 W
PL80         100.0000000 W
PL81         100.0000000 W
PL82         100.0000000 W
PL83         100.0000000 W
PL84         100.0000000 W
PL85         100.0000000 W
PL86         100.0000000 W
PL87         100.0000000 W
PL88         100.0000000 W
PL89         100.0000000 W
PL90         100.0000000 W
PL91         100.0000000 W
PL92         100.0000000 W
PL93         100.0000000 W
PL94         100.0000000 W
PL95         100.0000000 W
PL96         100.0000000 W
PL97         100.0000000 W
PL98         100.0000000 W
PL99         100.0000000 W
PL100        100.0000000 W
  
```

Figure S5. HSQC spectrum of 1.

HGQ-225  
 COSY  
 Pyridine-d5  
 880/YBY

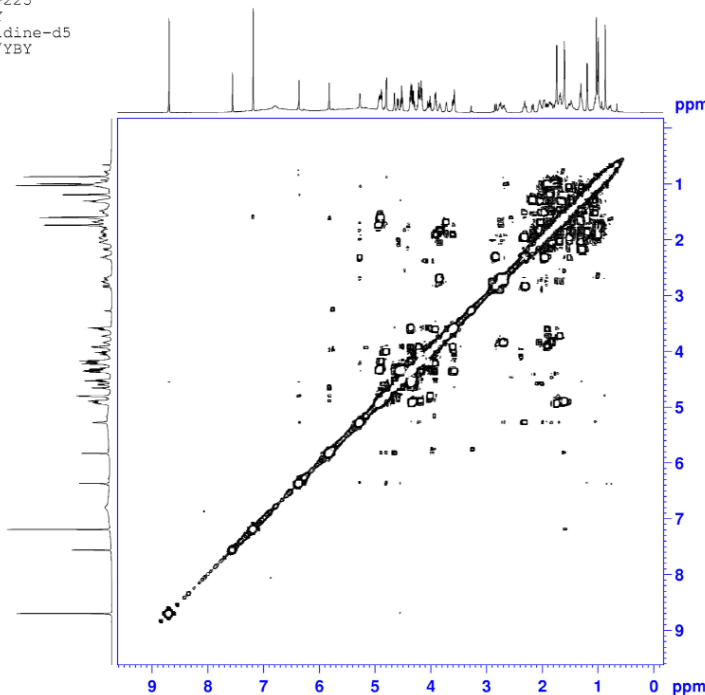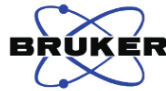

```

Current Data Parameters
NAME          YBY
EXPNO        880
PROCNO       1

F2 - Acquisition Parameters
Date_         20191113
Time         18.03
INSTRUM      Avance
PROBHD       5114601_0311_4
PULPROG      zgpg30p
TD           65536
SOLVENT      Pyz
NS           4
DS           16
SFO1         400.1464000 MHz
FIDRES       3.212577 Hz
AQ           0.1534840 sec
RG           64
SW           16.201
DE           6.200 usec
TE           298.15
CMT2         140.0000000
AQ           2.0000000 sec
d1           1.6600000 sec
d11          0.0017414 sec
d12          0.0000000 sec
d13          0.0000000 sec
DELTA        0.0025264 sec
IN0          0 sec
SFO1CT       0
dSFO1CT      0.00000300 sec
PIL1loop     0
PIL2loop     0
NUC1         13C
NUC2         1H
P1           9.83 usec
P2           19.66 usec
P3           1000.00 usec
PL1          27.0000000 W
PL2          100.0000000 W
PL3          100.0000000 W
PL4          100.0000000 W
PL5          100.0000000 W
PL6          100.0000000 W
PL7          100.0000000 W
PL8          100.0000000 W
PL9          100.0000000 W
PL10         100.0000000 W
PL11         100.0000000 W
PL12         100.0000000 W
PL13         100.0000000 W
PL14         100.0000000 W
PL15         100.0000000 W
PL16         100.0000000 W
PL17         100.0000000 W
PL18         100.0000000 W
PL19         100.0000000 W
PL20         100.0000000 W
PL21         100.0000000 W
PL22         100.0000000 W
PL23         100.0000000 W
PL24         100.0000000 W
PL25         100.0000000 W
PL26         100.0000000 W
PL27         100.0000000 W
PL28         100.0000000 W
PL29         100.0000000 W
PL30         100.0000000 W
PL31         100.0000000 W
PL32         100.0000000 W
PL33         100.0000000 W
PL34         100.0000000 W
PL35         100.0000000 W
PL36         100.0000000 W
PL37         100.0000000 W
PL38         100.0000000 W
PL39         100.0000000 W
PL40         100.0000000 W
PL41         100.0000000 W
PL42         100.0000000 W
PL43         100.0000000 W
PL44         100.0000000 W
PL45         100.0000000 W
PL46         100.0000000 W
PL47         100.0000000 W
PL48         100.0000000 W
PL49         100.0000000 W
PL50         100.0000000 W
PL51         100.0000000 W
PL52         100.0000000 W
PL53         100.0000000 W
PL54         100.0000000 W
PL55         100.0000000 W
PL56         100.0000000 W
PL57         100.0000000 W
PL58         100.0000000 W
PL59         100.0000000 W
PL60         100.0000000 W
PL61         100.0000000 W
PL62         100.0000000 W
PL63         100.0000000 W
PL64         100.0000000 W
PL65         100.0000000 W
PL66         100.0000000 W
PL67         100.0000000 W
PL68         100.0000000 W
PL69         100.0000000 W
PL70         100.0000000 W
PL71         100.0000000 W
PL72         100.0000000 W
PL73         100.0000000 W
PL74         100.0000000 W
PL75         100.0000000 W
PL76         100.0000000 W
PL77         100.0000000 W
PL78         100.0000000 W
PL79         100.0000000 W
PL80         100.0000000 W
PL81         100.0000000 W
PL82         100.0000000 W
PL83         100.0000000 W
PL84         100.0000000 W
PL85         100.0000000 W
PL86         100.0000000 W
PL87         100.0000000 W
PL88         100.0000000 W
PL89         100.0000000 W
PL90         100.0000000 W
PL91         100.0000000 W
PL92         100.0000000 W
PL93         100.0000000 W
PL94         100.0000000 W
PL95         100.0000000 W
PL96         100.0000000 W
PL97         100.0000000 W
PL98         100.0000000 W
PL99         100.0000000 W
PL100        100.0000000 W
  
```

Figure S6. <sup>1</sup>H-<sup>1</sup>H COSY spectrum of 1.

HGQ-225  
HMBC  
Pyridine-d5  
881/YBY

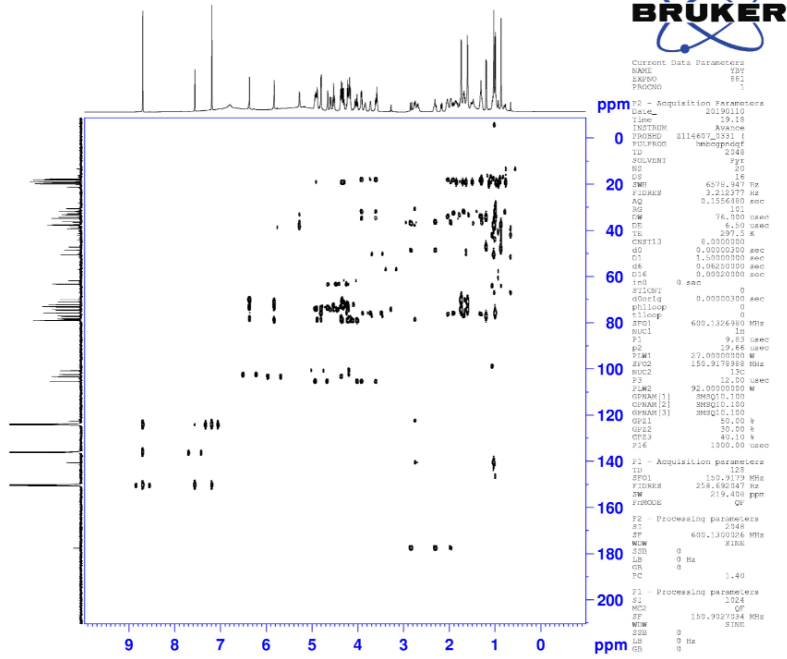

Figure S7. HMBC spectrum of 1.

HGQ-225  
NOESY  
Pyridine-d5  
883/YBY

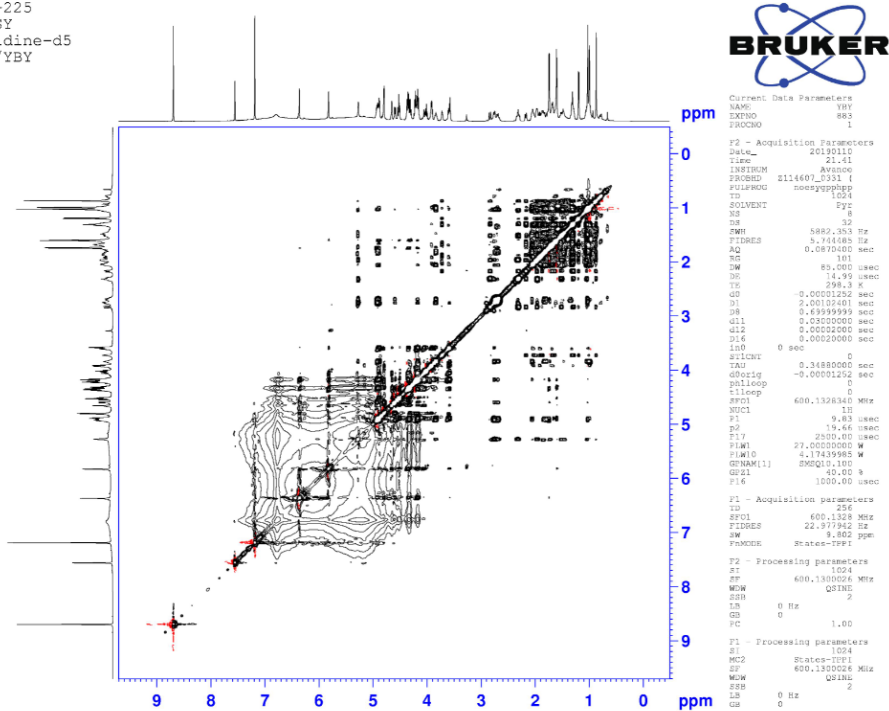

Figure S8. NOESY spectrum of 1.

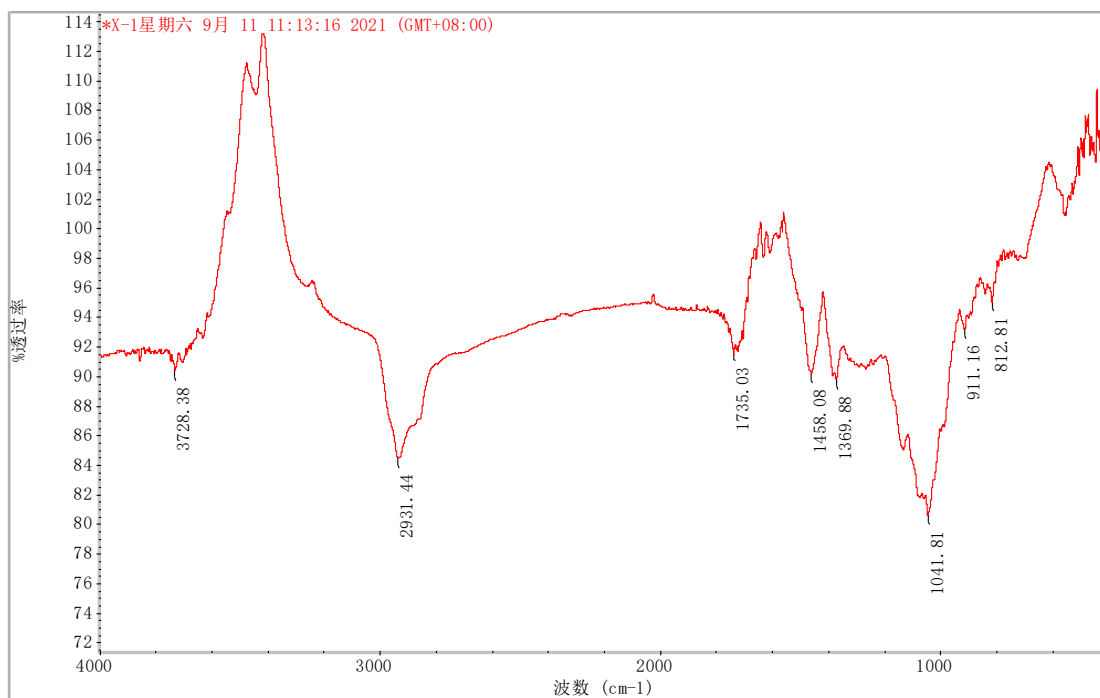

Figure S9. IR spectrum of 1.

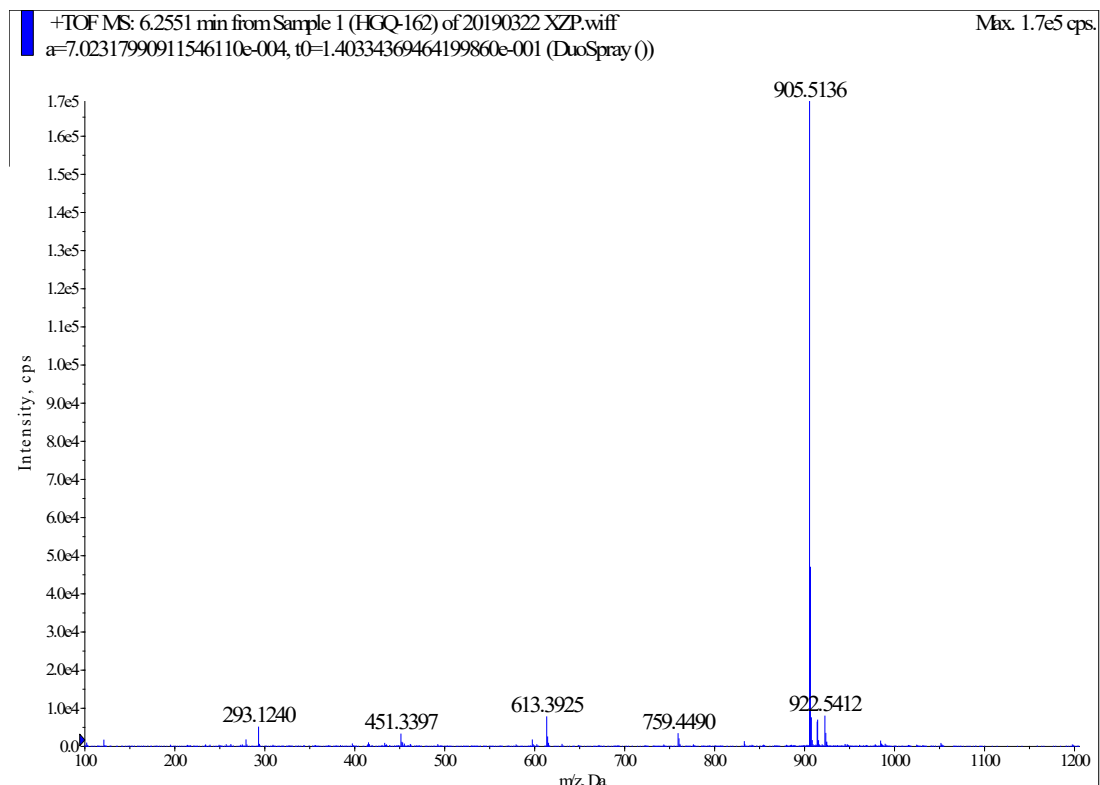

Figure S10. HR-ESI-MS spectrum of 2.





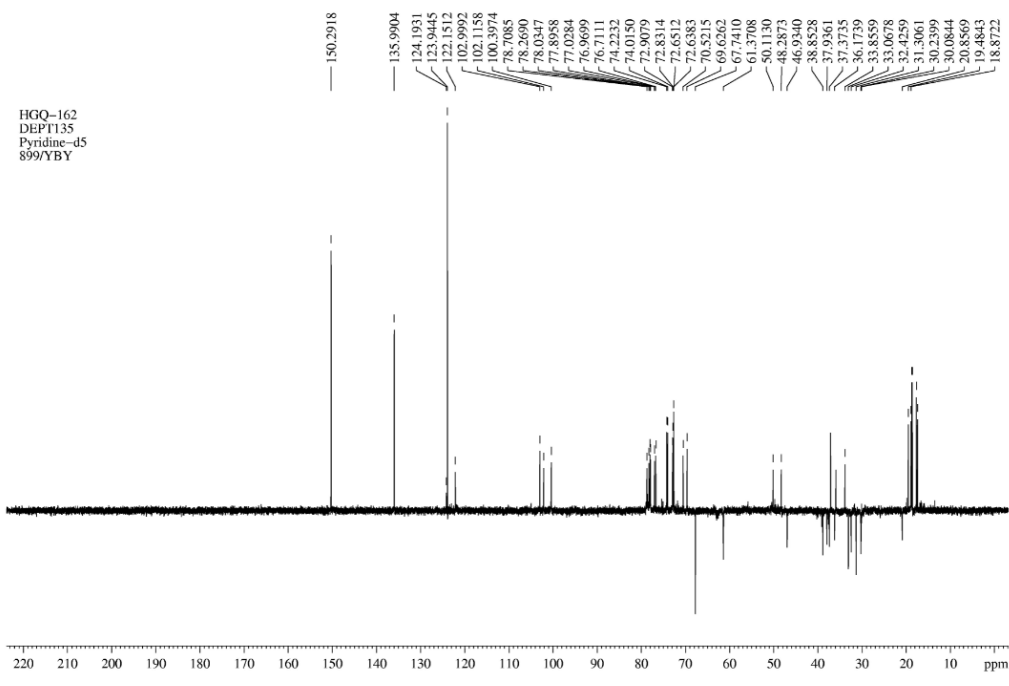

Figure S13. DEPT 135 spectrum of 2.

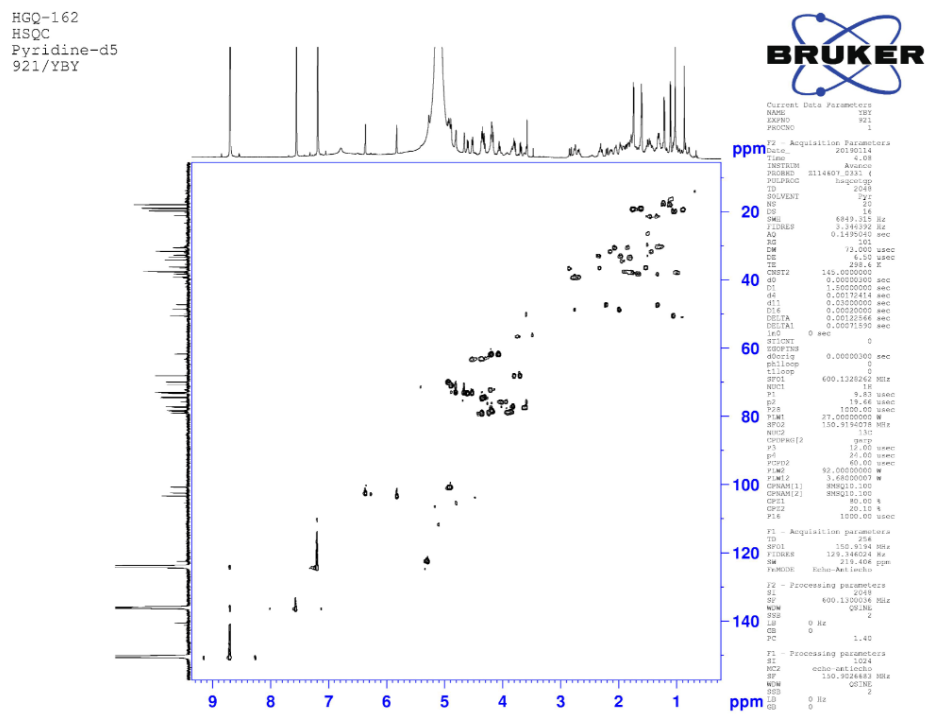

Figure S14. HSQC spectrum of 2.

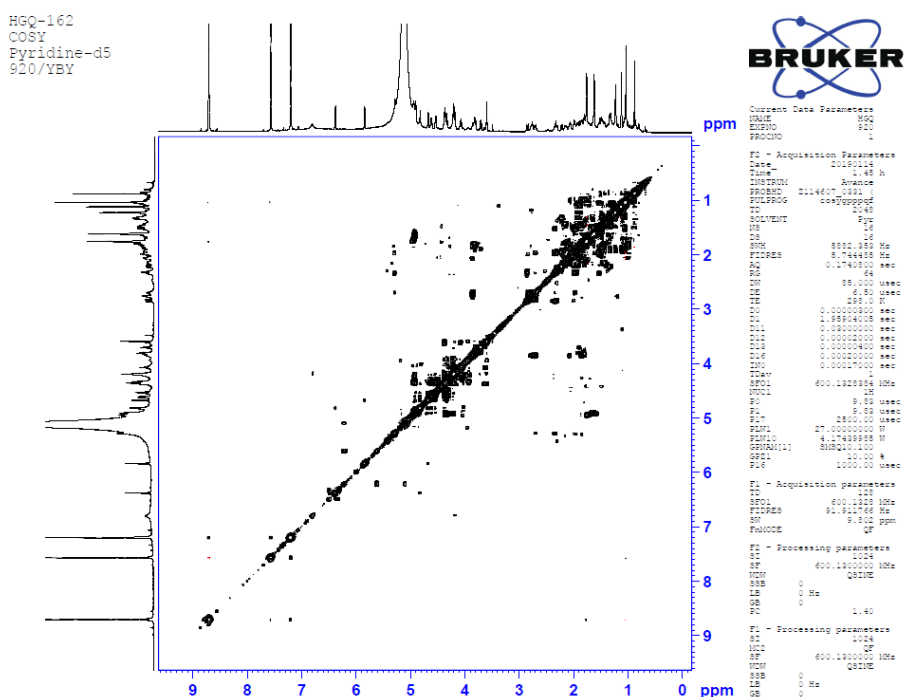

Figure S15.  $^1\text{H}$ - $^1\text{H}$  COSY spectrum of **2**.

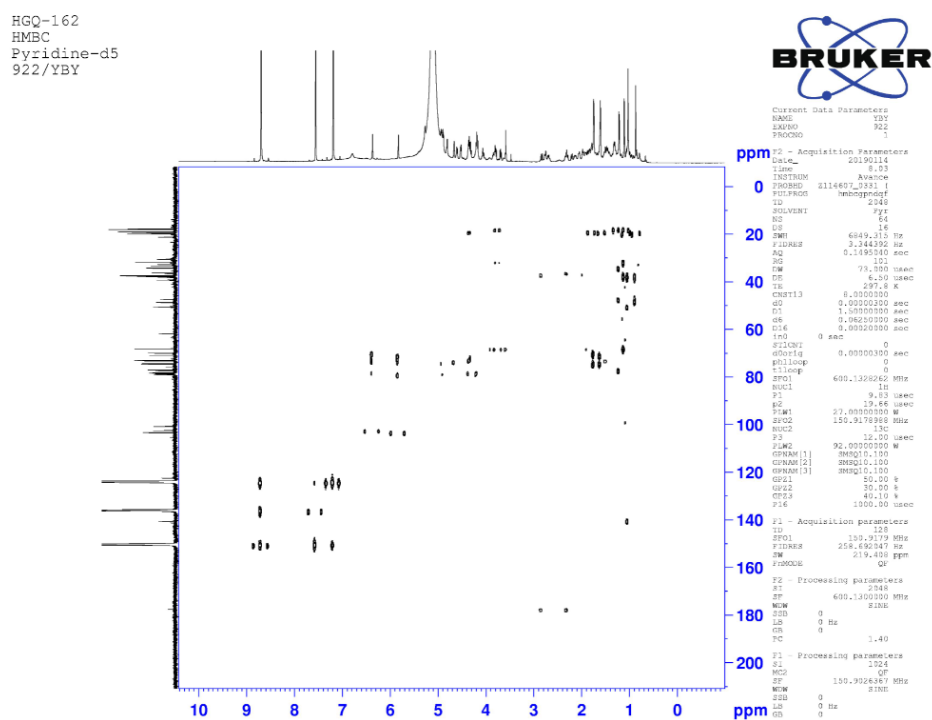

Figure S16. HMBC spectrum of **2**.

HGQ-162  
NOESY  
Pyridine-d5  
923/YBY

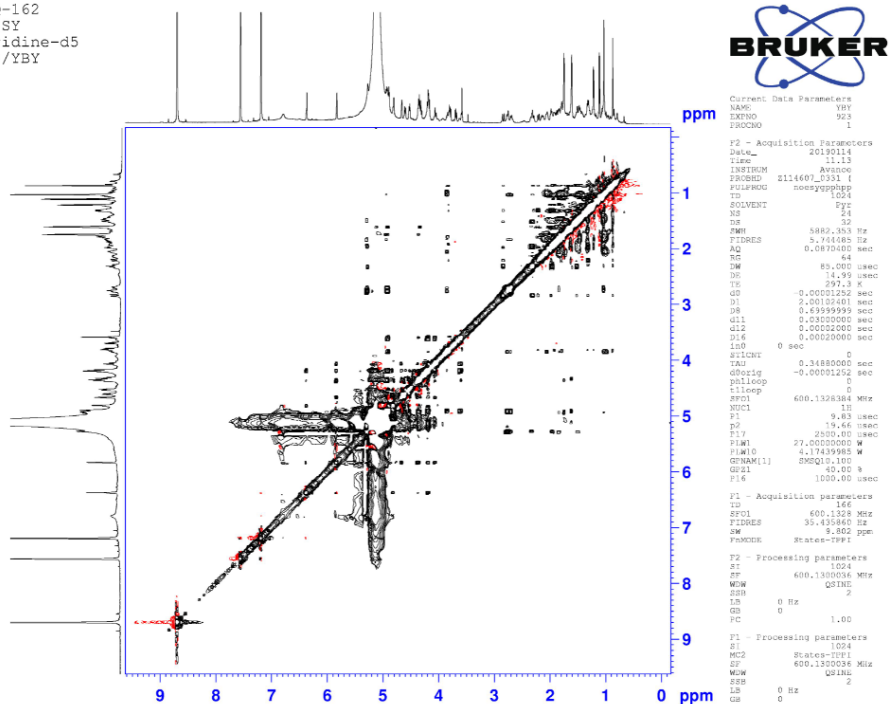

Figure S17. NOESY spectrum of 2.

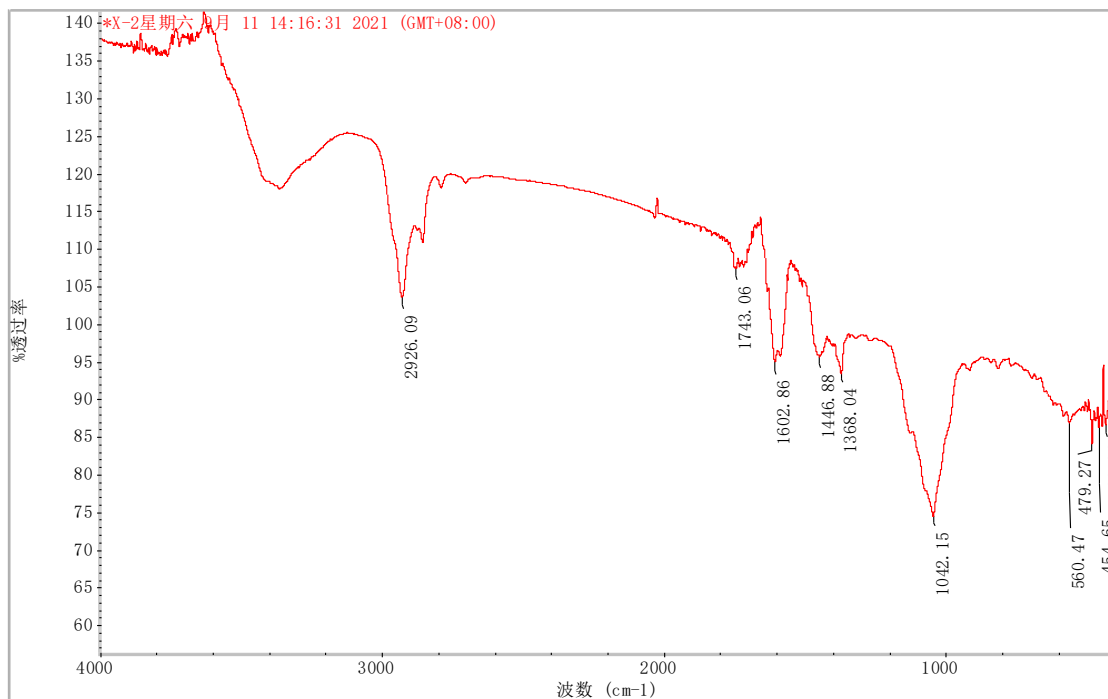

Figure S18. IR spectrum of 2.

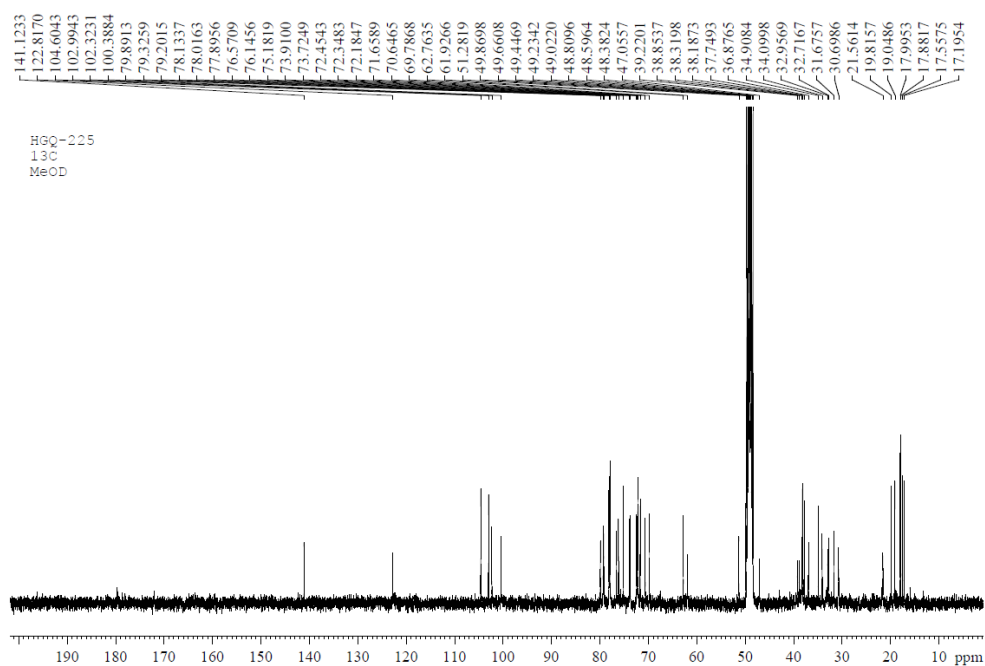

**Figure S19.**  $^{13}\text{C}$  NMR spectrum of **1** (100 MHz, methanol- $d_4$ ).

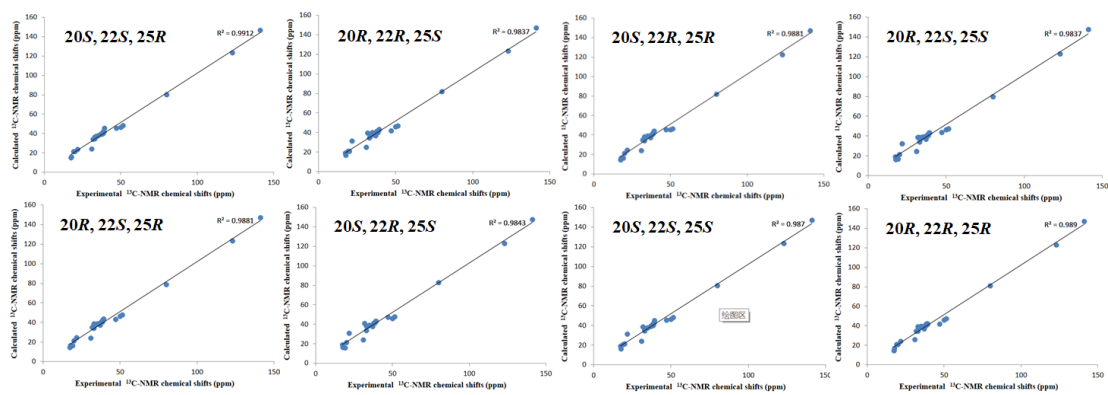

**Figure S20.** Linear correlations between the calculated of 8 isomers and experimental  $^{13}\text{C}$  NMR chemical shifts for compound **1**.

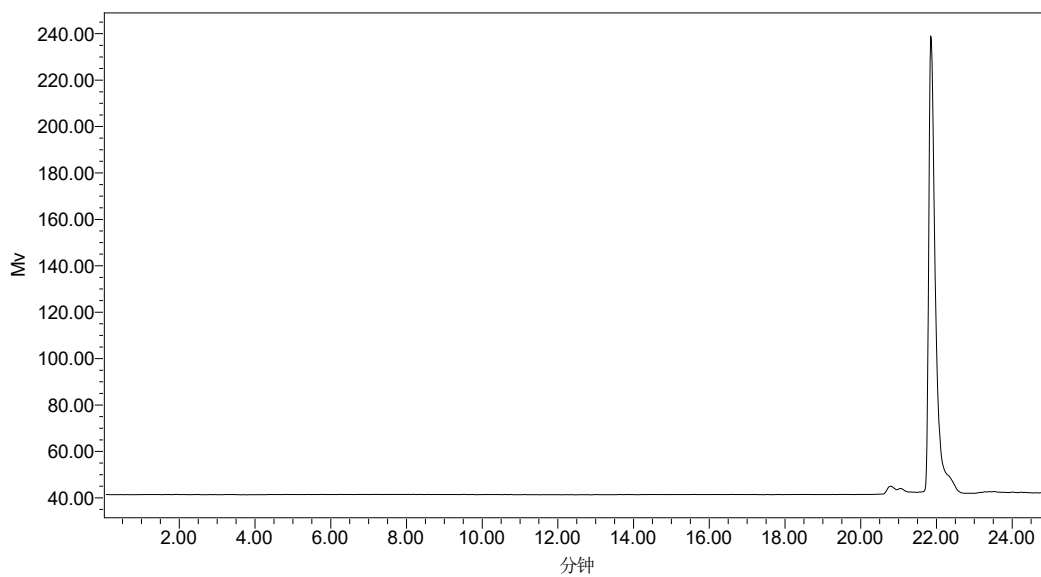

**Figure S21.** HPLC-ELSD analysis of **1**.

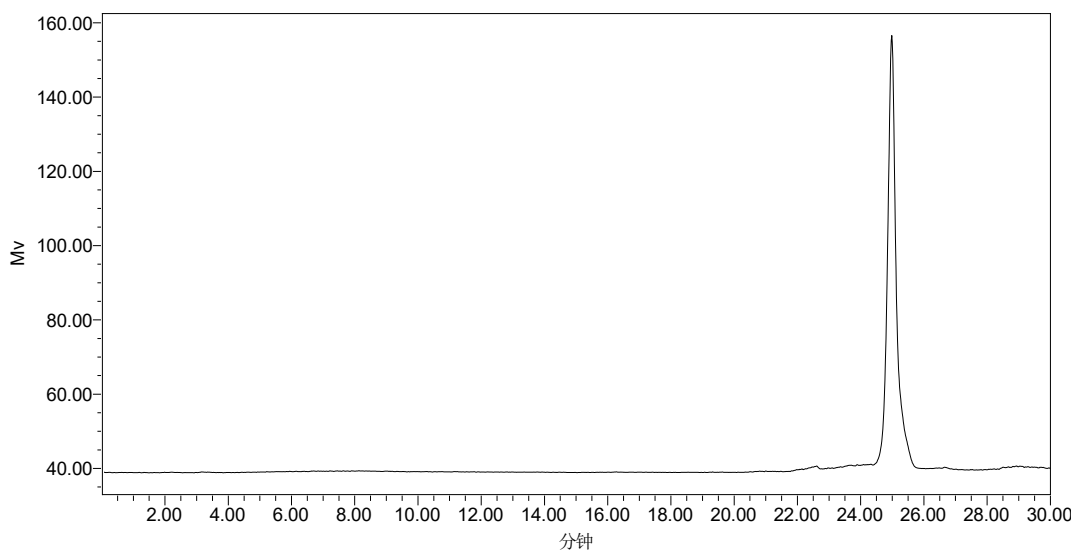

**Figure S22.** HPLC-ELSD analysis of **2**.



HGQ-225  
HSQC  
Pyridine-d5  
882/YBY

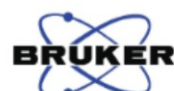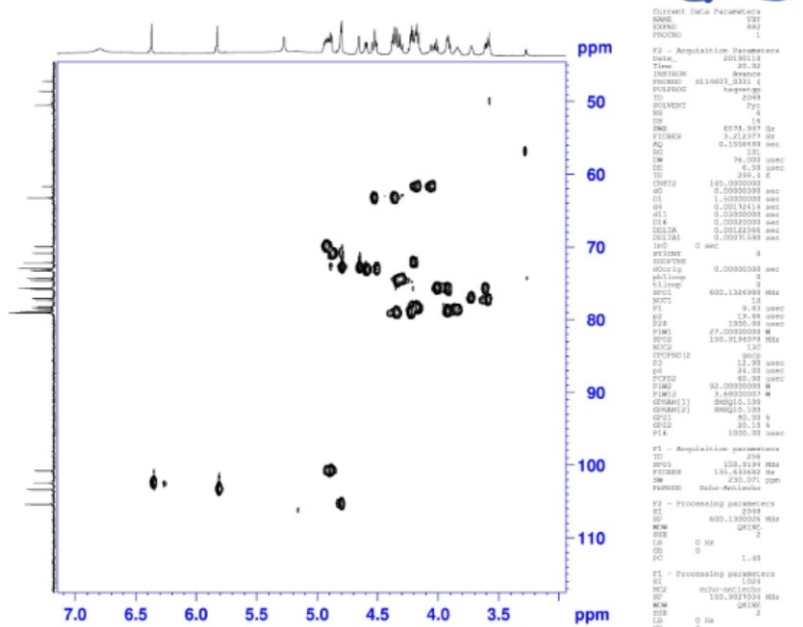

Figure S25. The partial enlargement of the HSQC spectrum of 1 (c).

HGQ-225  
COSY  
Pyridine-d5  
880/YBY

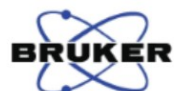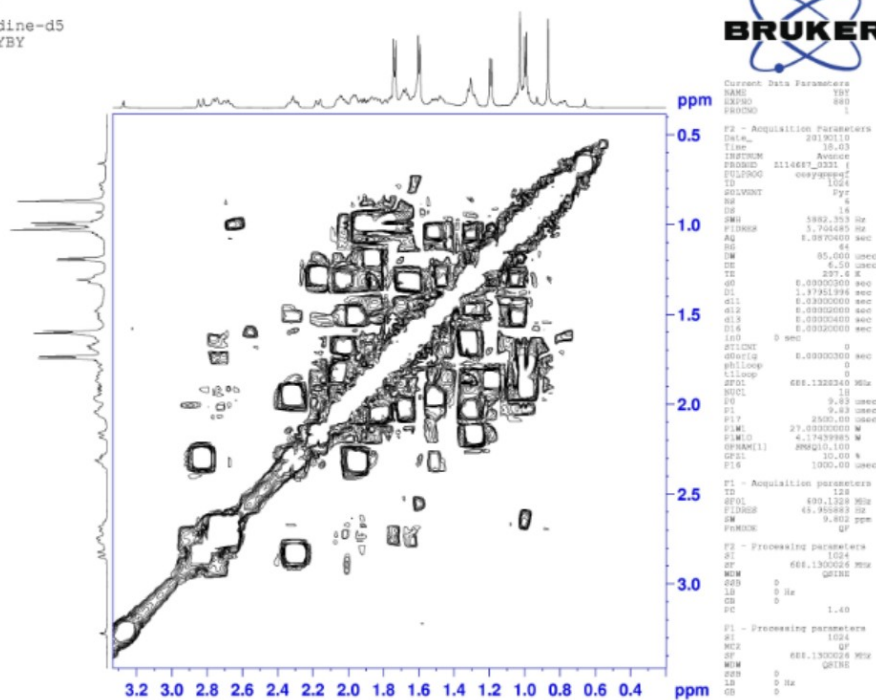

Figure S26. The partial enlargement of the  $^1\text{H}$ - $^1\text{H}$  COSY spectrum of 1 (a).



HQO-225  
COSY  
Pyridine-d5  
880/YBY

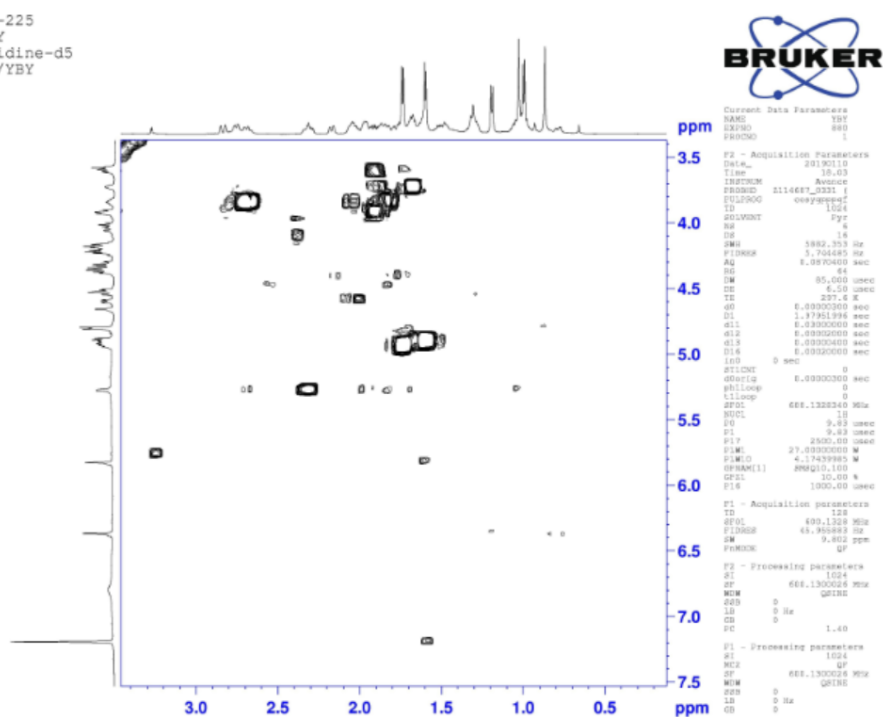

Figure S27. The partial enlargement of the  $^1\text{H}$ - $^1\text{H}$  COSY spectrum of **1** (b).

HQO-225  
COSY  
Pyridine-d5  
880/YBY

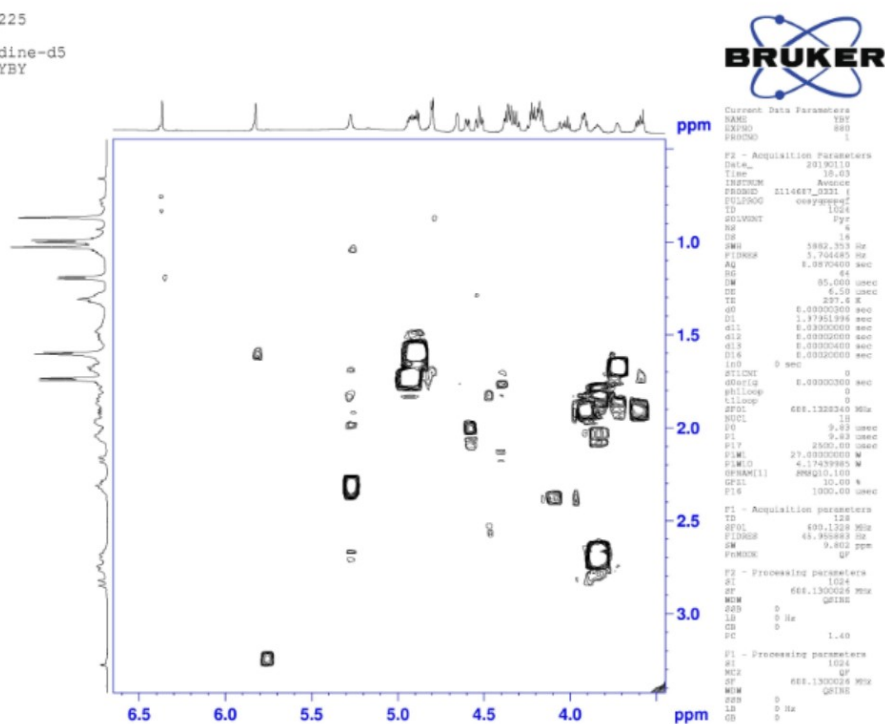

Figure S28. The partial enlargement of the  $^1\text{H}$ - $^1\text{H}$  COSY spectrum of **1** (c).

HGQ-225  
COSY  
Pyridine-d5  
880/YBY

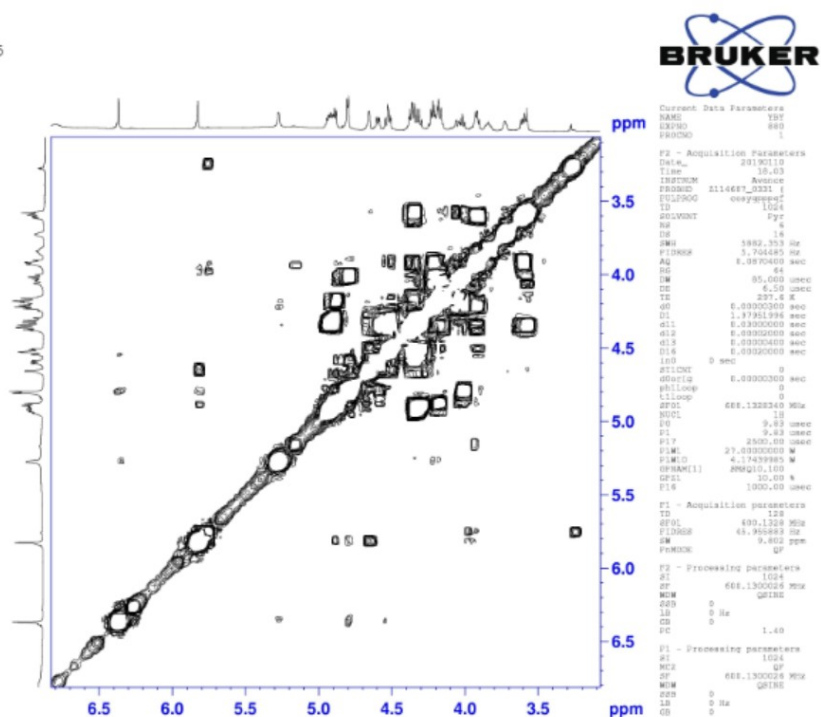

Figure S29. The partial enlargement of the  $^1\text{H}$ - $^1\text{H}$  COSY spectrum of **1** (e).

HGQ-225  
HMBC  
Pyridine-d5  
881/YBY

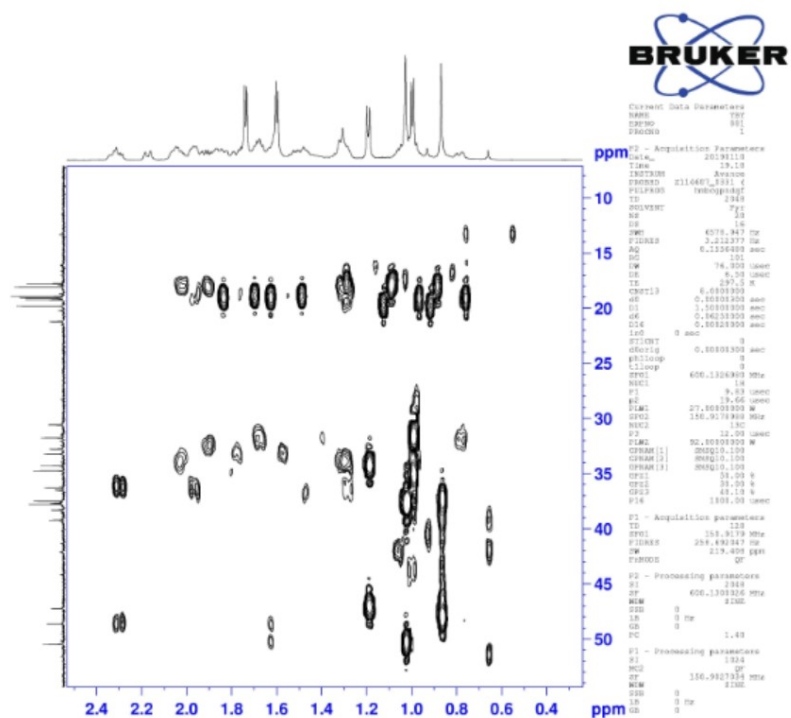

Figure S30. The partial enlargement of the HMBC spectrum of **1** (a).

HQ-225  
HMBC  
Pyridine-d5  
881/YBY

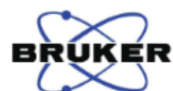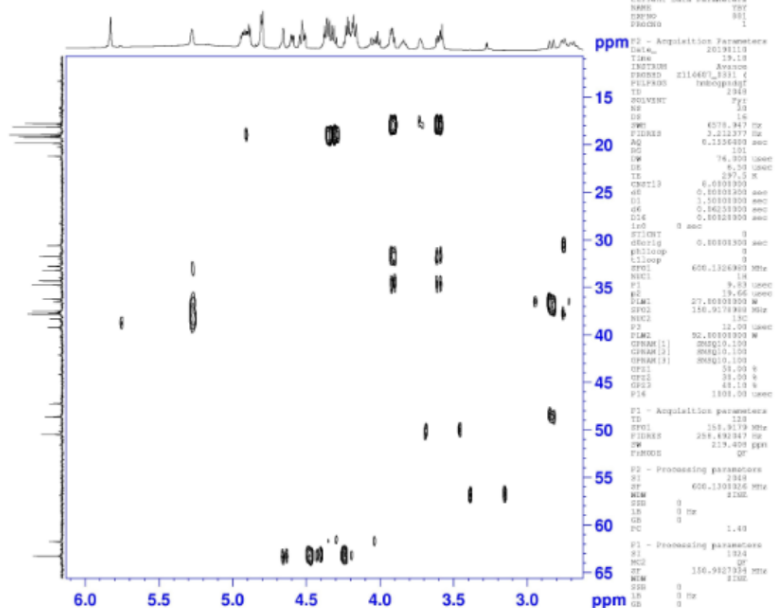

Figure S31. The partial enlargement of the HMBC spectrum of 1 (b).

HQ-225  
HMBC  
Pyridine-d5  
881/YBY

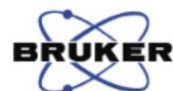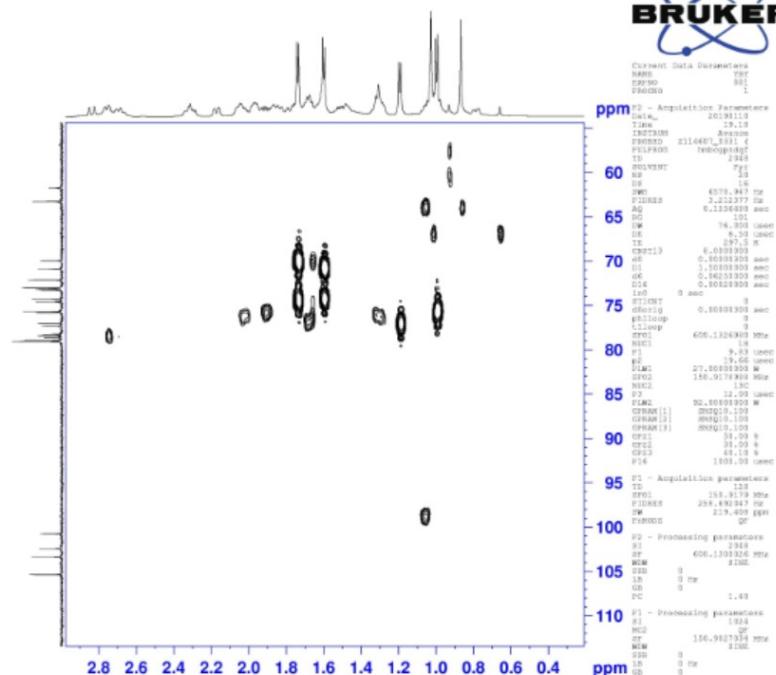

Figure S32. The partial enlargement of the HMBC spectrum of 1 (c).

HGQ-225  
HMBC  
Pyridine-d5  
881/YBY

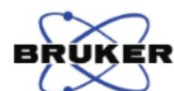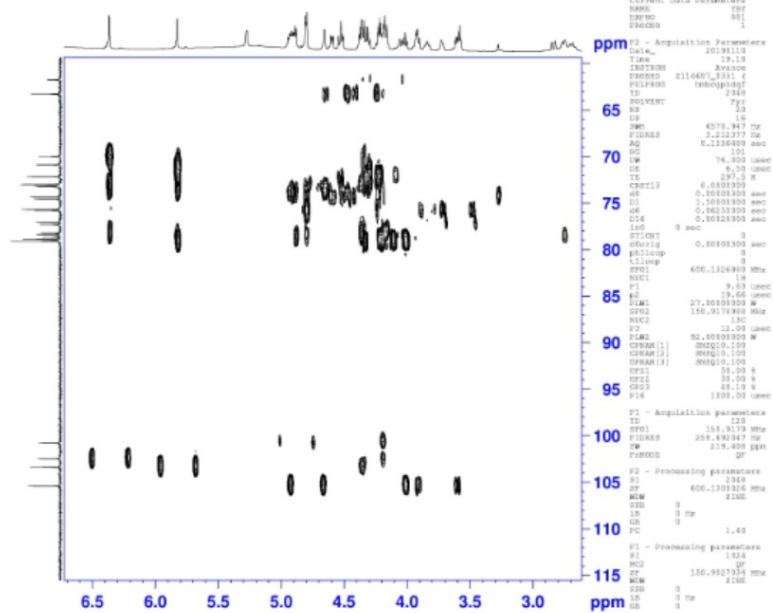

Figure S33. The partial enlargement of the HMBC spectrum of 1 (d).

HGQ-225  
NOESY  
Pyridine-d5  
883/YBY

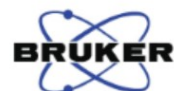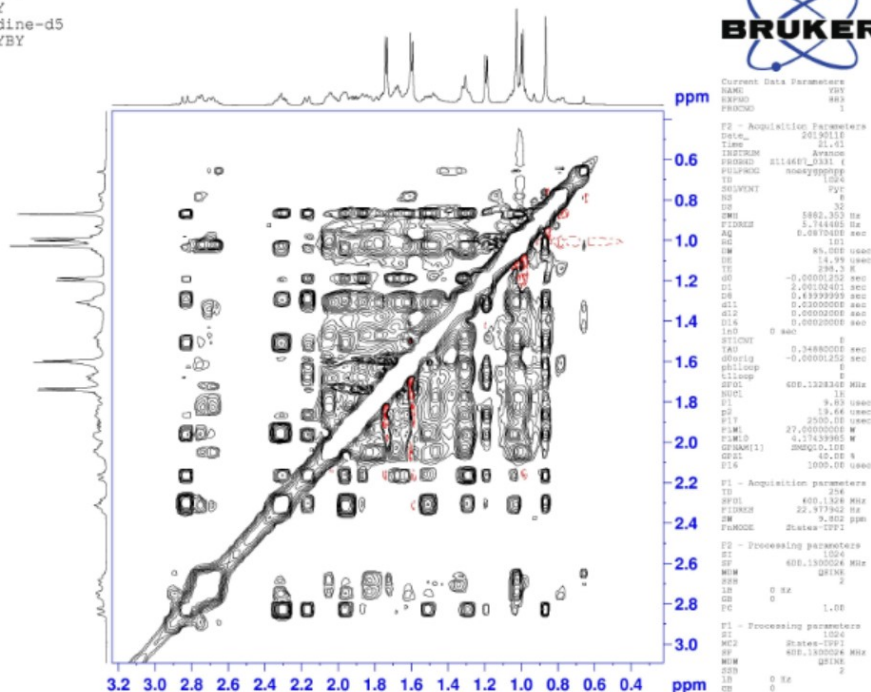

Figure S34. The partial enlargement of the NOESY spectrum of 1 (a).

HGQ-225  
NOESY  
Pyridine-d5  
883/YBY

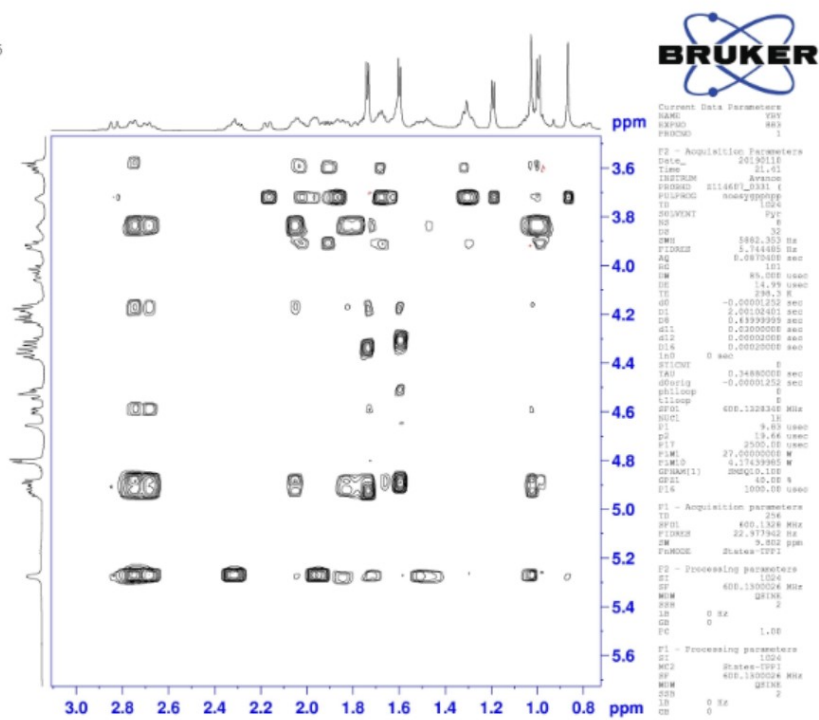

Figure S35. The partial enlargement of the NOESY spectrum of 1 (b).

HGQ-225  
NOESY  
Pyridine-d5  
883/YBY

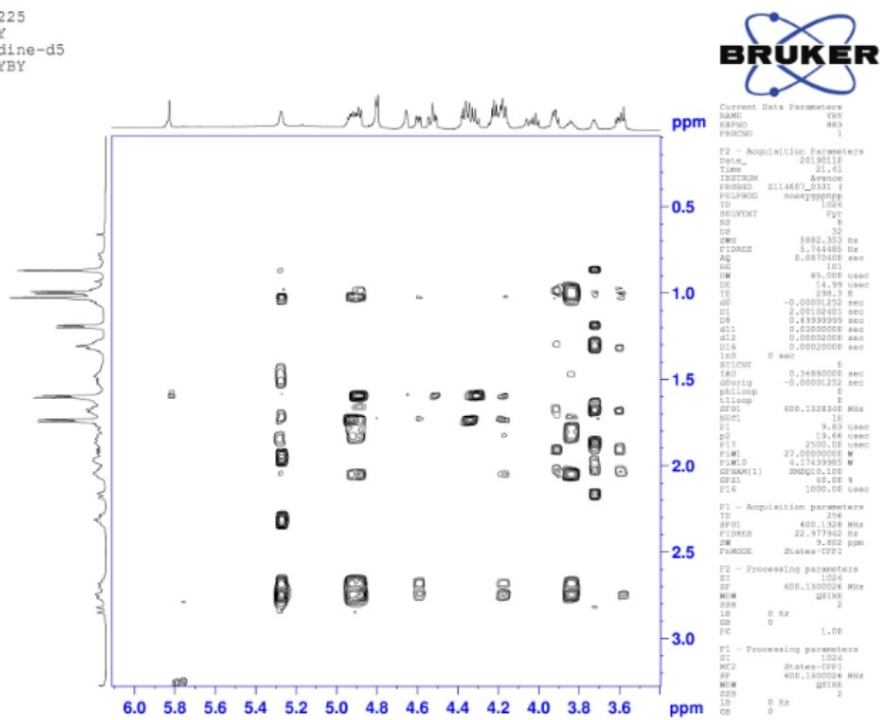

Figure S36. The partial enlargement of the NOESY spectrum of 1 (c).

HQ-162  
HSQC  
Pyridine-d5  
921/YBY

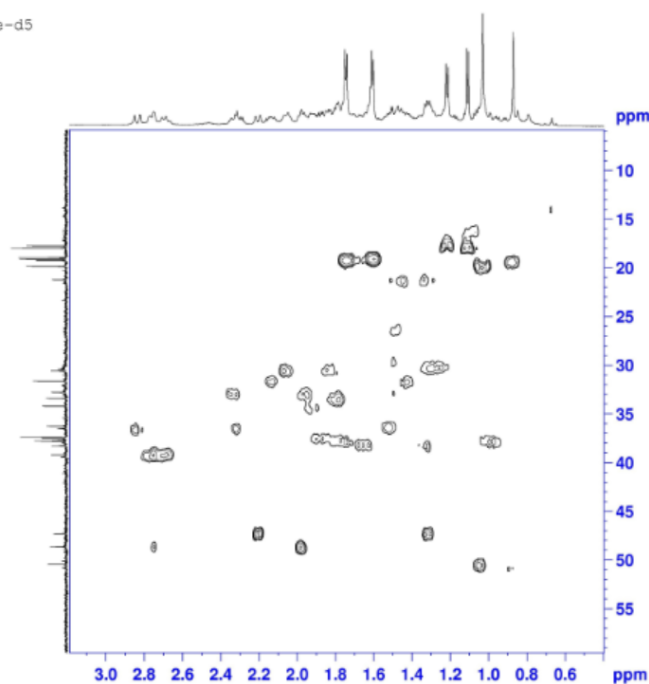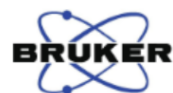

```
Current Data Parameters
NAME: 20180114
EXPNO: 1
PROCNO: 1
F2 - Acquisition Parameters
Date_: 20180114
Time: 4.39
INSTRUM: Avance
PROBHD: 514601_3331.c
PULPROG: zgpg30
TD: 65536
SOLVENT: Py
NS: 2048
DS: 4
SWH: 8041.318 Hz
FIDRES: 0.344392 Hz
AQ: 0.197009 sec
RG: 321
AQ2: 79.000 usec
DE: 6.70 usec
TE: 300.2 K
C1P2: 145.000000 sec
d1: 0.000000 sec
d11: 1.000000 sec
d12: 0.0012414 sec
d13: 0.000000 sec
d14: 0.000000 sec
DELTA: 0.000000 sec
DELTA2: 0.0012500 sec
DELTA3: 0.000000 sec
INSTRUM: spect
AQ: 0 sec
d1: 0
d11: 0.000000 sec
d12: 0
d13: 0
d14: 0
P1: 600.132842 MHz
P2: 13
P3: 13 usec
P4: 13.00 usec
P5: 13.00 usec
P6: 1300.00 MHz
P7: 0.0000000 M
P8: 130.918497 MHz
P9: 130
P10: 130
P11: 13.00 usec
P12: 60.00 usec
P13: 60.00 usec
P14: 0.0000000 M
P15: 3.4000000 M
P16: 3.4000000 M
P17: 30.70 usec
P18: 30.70 usec
P19: 1300.00 MHz
P20: 1300.00 MHz
P21 - Acquisition parameters
TD: 65536
SF: 500.132842 MHz
PC: 130.918497 MHz
PULPROG: zgpg30
PC: 0 Hz
DE: 0
PC: 0
P2 - Processing parameters
SI: 32768
SF: 500.132842 MHz
WDW: EM
SSB: 0
LB: 0 Hz
GB: 0
PC: 1.00
P3 - Processing parameters
SI: 32768
SF: 500.132842 MHz
WDW: EM
SSB: 0
LB: 0 Hz
GB: 0
```

Figure S37. The partial enlargement of the HSQC spectrum of 2 (a).

HQ-162  
HSQC  
Pyridine-d5  
921/YBY

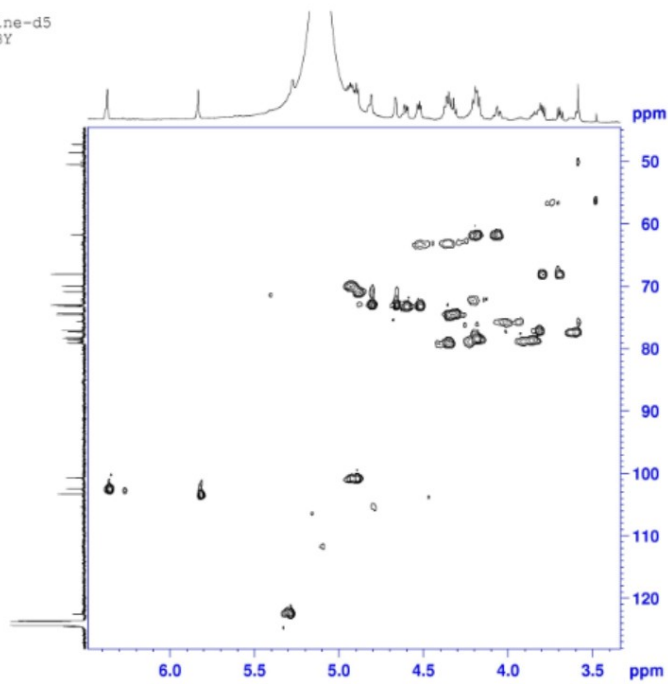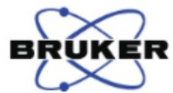

```
Current Data Parameters
NAME: 20180114
EXPNO: 1
PROCNO: 1
F2 - Acquisition Parameters
Date_: 20180114
Time: 4.39
INSTRUM: Avance
PROBHD: 514601_3331.c
PULPROG: zgpg30
TD: 65536
SOLVENT: Py
NS: 2048
DS: 4
SWH: 8041.318 Hz
FIDRES: 0.344392 Hz
AQ: 0.197009 sec
RG: 321
AQ2: 79.000 usec
DE: 6.70 usec
TE: 300.2 K
C1P2: 145.000000 sec
d1: 0.000000 sec
d11: 1.000000 sec
d12: 0.0012414 sec
d13: 0.000000 sec
d14: 0.000000 sec
DELTA: 0.000000 sec
DELTA2: 0.0012500 sec
DELTA3: 0.000000 sec
INSTRUM: spect
AQ: 0 sec
d1: 0
d11: 0.000000 sec
d12: 0
d13: 0
d14: 0
P1: 600.132842 MHz
P2: 13
P3: 13 usec
P4: 13.00 usec
P5: 13.00 usec
P6: 1300.00 MHz
P7: 0.0000000 M
P8: 130.918497 MHz
P9: 130
P10: 130
P11: 13.00 usec
P12: 60.00 usec
P13: 60.00 usec
P14: 0.0000000 M
P15: 3.4000000 M
P16: 3.4000000 M
P17: 30.70 usec
P18: 30.70 usec
P19: 1300.00 MHz
P20: 1300.00 MHz
P21 - Acquisition parameters
TD: 65536
SF: 500.132842 MHz
PC: 130.918497 MHz
PULPROG: zgpg30
PC: 0 Hz
DE: 0
PC: 0
P2 - Processing parameters
SI: 32768
SF: 500.132842 MHz
WDW: EM
SSB: 0
LB: 0 Hz
GB: 0
PC: 1.00
P3 - Processing parameters
SI: 32768
SF: 500.132842 MHz
WDW: EM
SSB: 0
LB: 0 Hz
GB: 0
```

Figure S38. The partial enlargement of the HSQC spectrum of 2 (b).

HQO-162  
COSY  
Pyridine-d5  
920/YBY

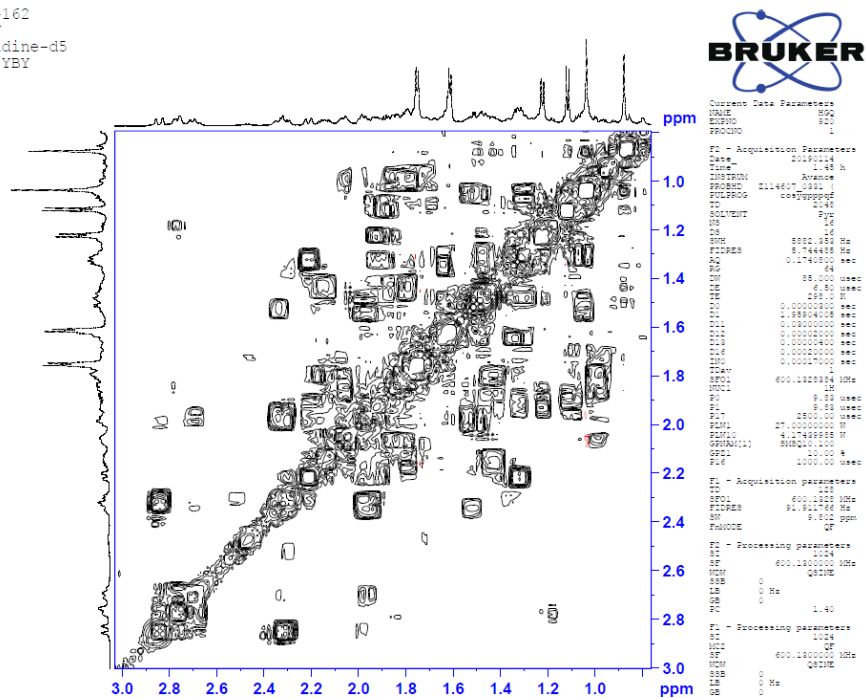

Figure S39. The partial enlargement of the  $^1\text{H}$ - $^1\text{H}$  COSY spectrum of 2 (a).

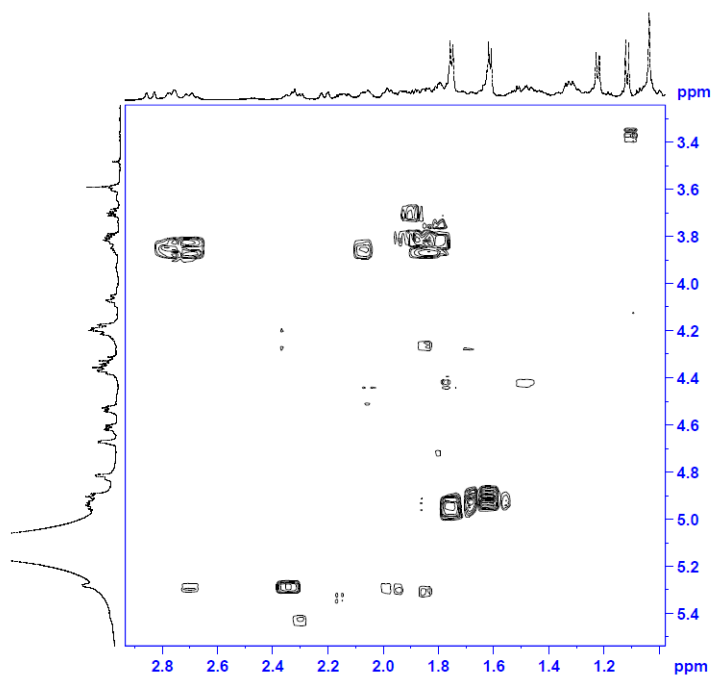

Figure S40. The partial enlargement of the  $^1\text{H}$ - $^1\text{H}$  COSY spectrum of 2 (b).

HQ-162  
HMBC  
Pyridine-d5  
922/YBY

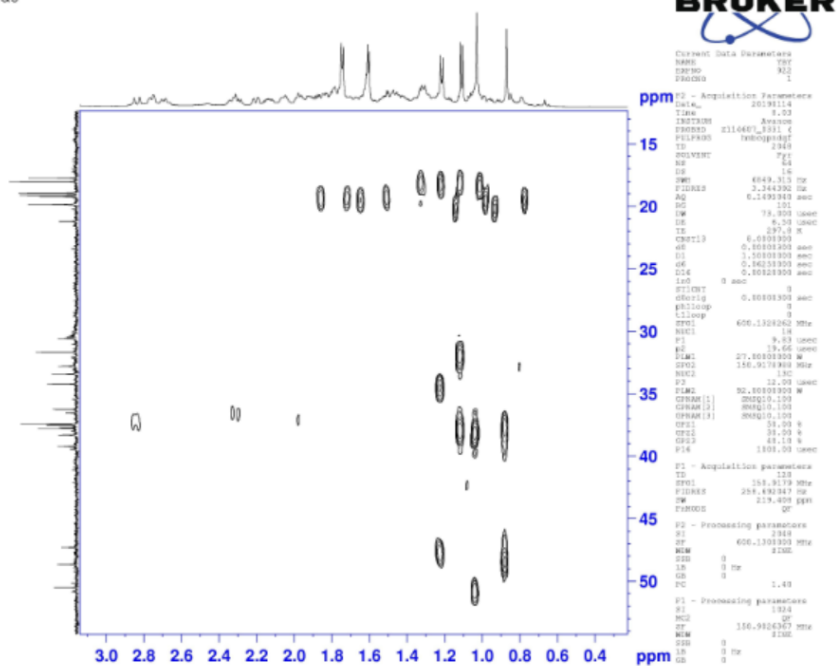

Figure S41. The partial enlargement of the HMBC spectrum of 2 (a).

HQ-162  
HMBC  
Pyridine-d5  
922/YBY

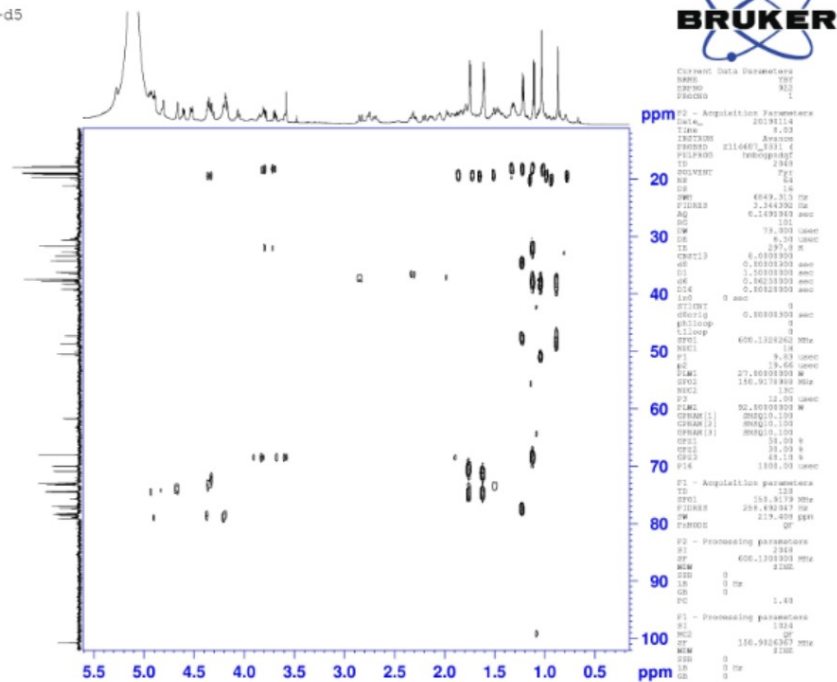

Figure S42. The partial enlargement of the HMBC spectrum of 2 (b).



HGQ-162  
HMBC  
Pyridine-d5  
922/YBY

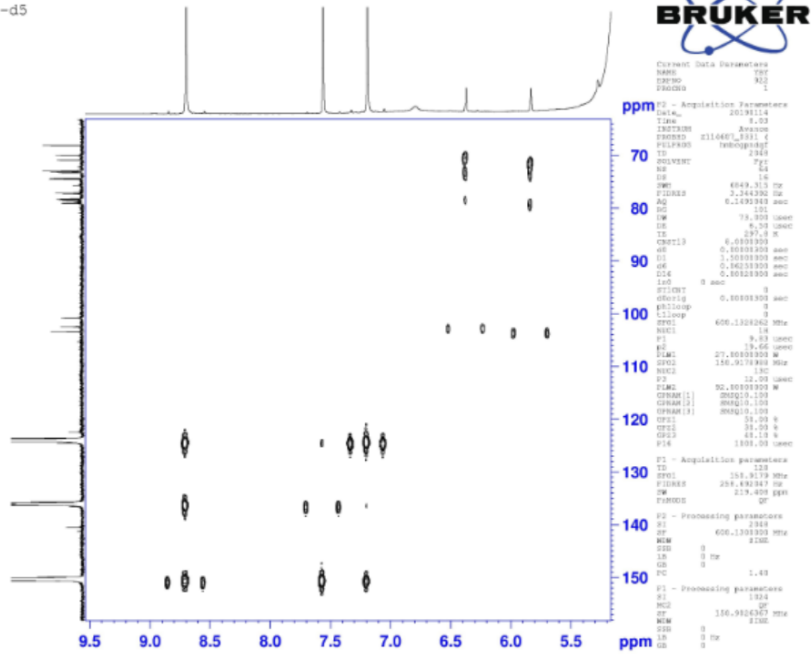

Figure S43. The partial enlargement of the HMBC spectrum of 2 (c).

HGQ-162  
NOESY  
Pyridine-d5  
923/YBY

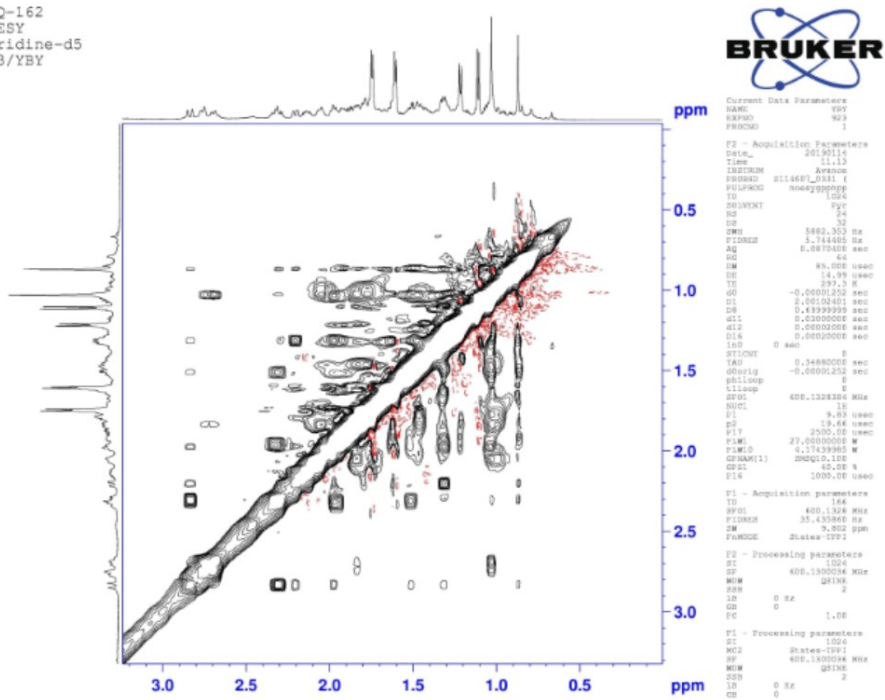

Figure S44. The partial enlargement of the NOESY spectrum of 2 (a).

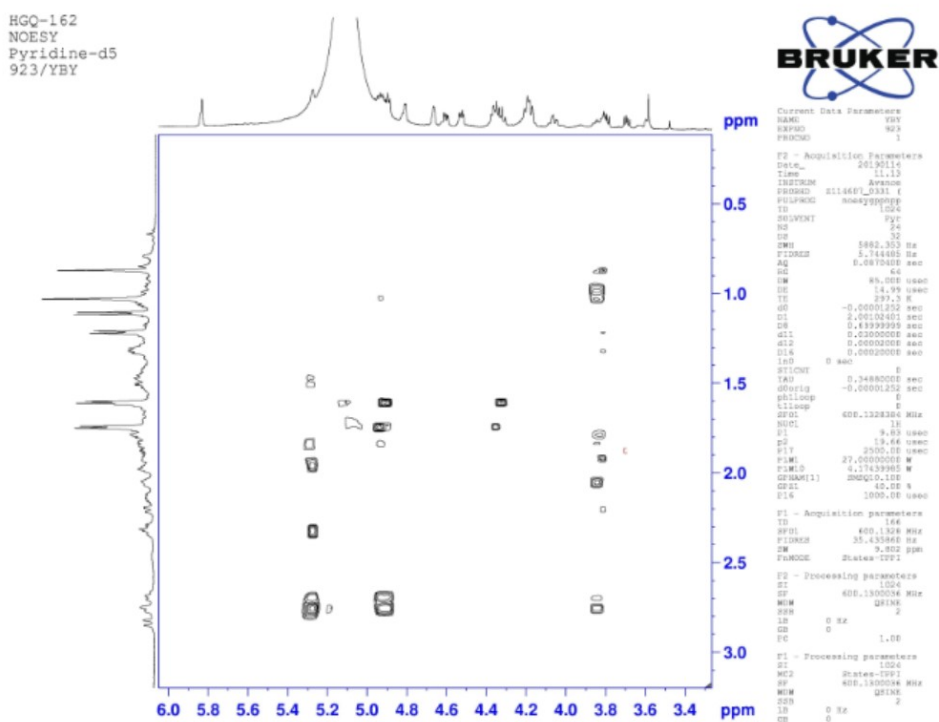

Figure S45. The partial enlargement of the NOESY spectrum of 2 (b).

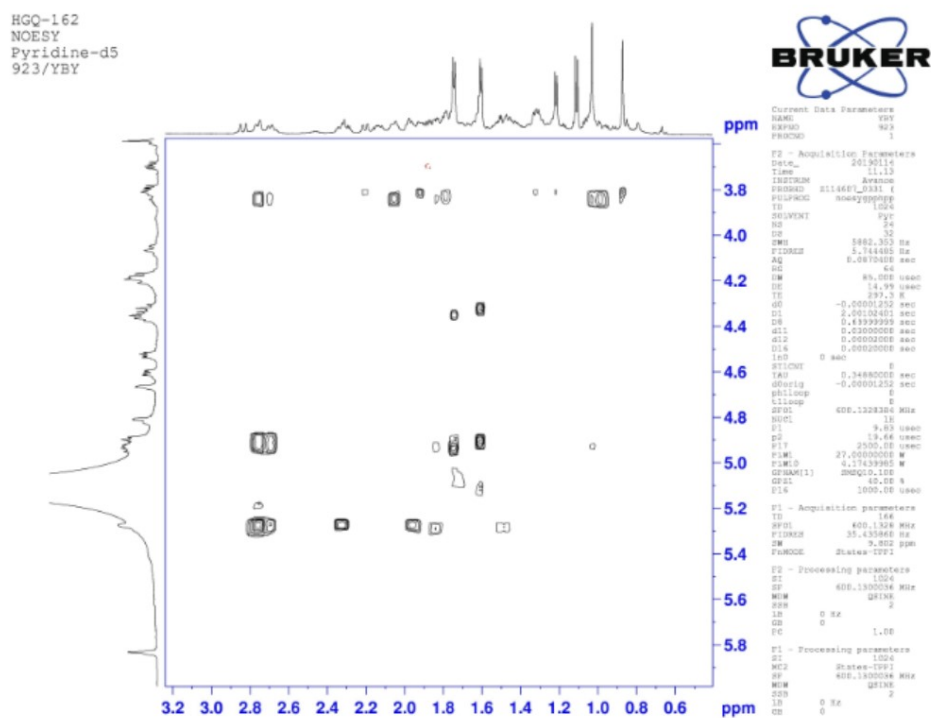

Figure S46. The partial enlargement of the NOESY spectrum of 2 (c).

HGQ-162  
NOESY  
Pyridine-d5  
923/YBY

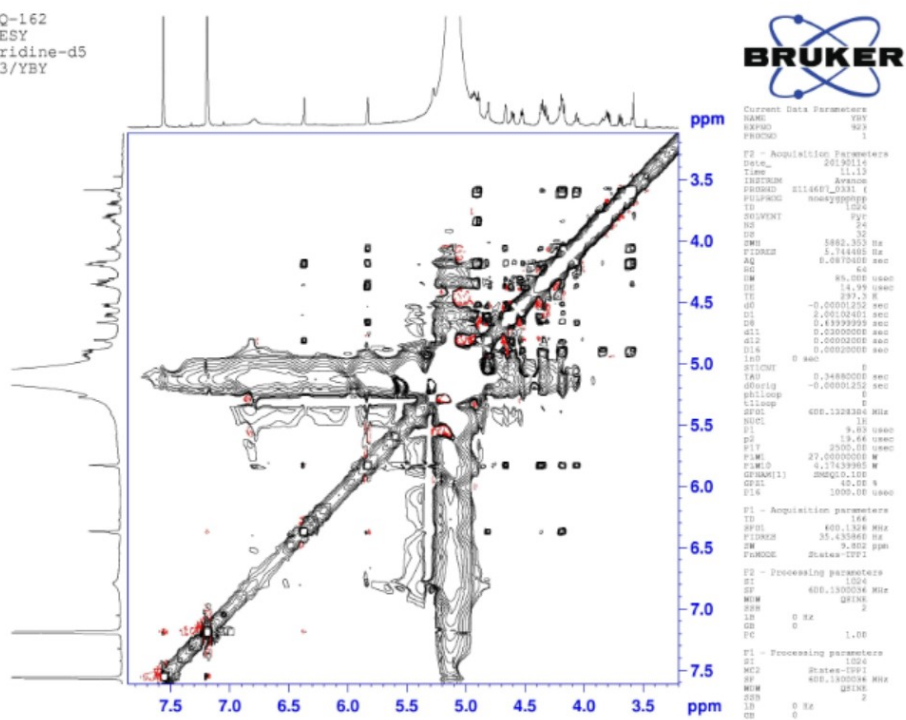

Figure S47. The partial enlargement of the NOESY spectrum of 2 (d).
